# Supplementary material for: Characterization of the virulence of three novel clade 2 Clostridioides (Clostridium) difficile strains and a two-year screening in animals and humans in Brazil
Source: PubMed Central journal article supplement (PMC9416996; doi:10.1371/journal.pone.0273013), 2022-08-26
Supplement: pone.0273013.s003.pdf [file pone.0273013.s003.pdf]

Supplementary Table 1: Virulence genes and their function in the Brazilian *Clostridioides difficile* strains RT883, RT884 and RT885.

| Genes               | Function/ Relevance     | Strains |       |       |
|---------------------|-------------------------|---------|-------|-------|
|                     |                         | RT883   | RT884 | RT885 |
| <b><i>fbpc8</i></b> | Adhesin                 | +       | +     | +     |
| <b><i>cwp66</i></b> | Adhesin                 | +       | +     | +     |
| <b><i>cwp84</i></b> | Adhesin                 | +       | +     | +     |
| <b><i>slpa</i></b>  | Adhesin                 | +       | +     | +     |
| <b><i>groel</i></b> | Adhesin                 | +       | +     | +     |
| <b><i>cfr</i></b>   | Linezolid Resistance    | +       | +     | +     |
| <b><i>rpld</i></b>  | Linezolid Resistance    | +       | -     | +     |
| <b><i>vang</i></b>  | Vancomycin resistance   | +       | +     | +     |
| <b><i>vans</i></b>  | Vancomycin resistance   | +       | -     | -     |
| <b><i>ermb</i></b>  | Erythromycin resistance | -       | -     | -     |
| <b><i>soda</i></b>  | Superoxide dismutase    | -       | -     | -     |
| <b><i>trea</i></b>  | Trehalose metabolism    | -       | -     | -     |
| <b><i>flic</i></b>  | Flagellin               | -       | -     | -     |
| <b><i>flid</i></b>  | Flagellin               | +       | +     | +     |
| <b><i>spo0a</i></b> | Sporulation             | +       | +     | +     |
| <b><i>cotaf</i></b> | Spore formation         | +       | +     | +     |
| <b><i>cotbf</i></b> | Spore protein           | +       | +     | +     |
| <b><i>cotcf</i></b> | Spore protein           | +       | +     | +     |

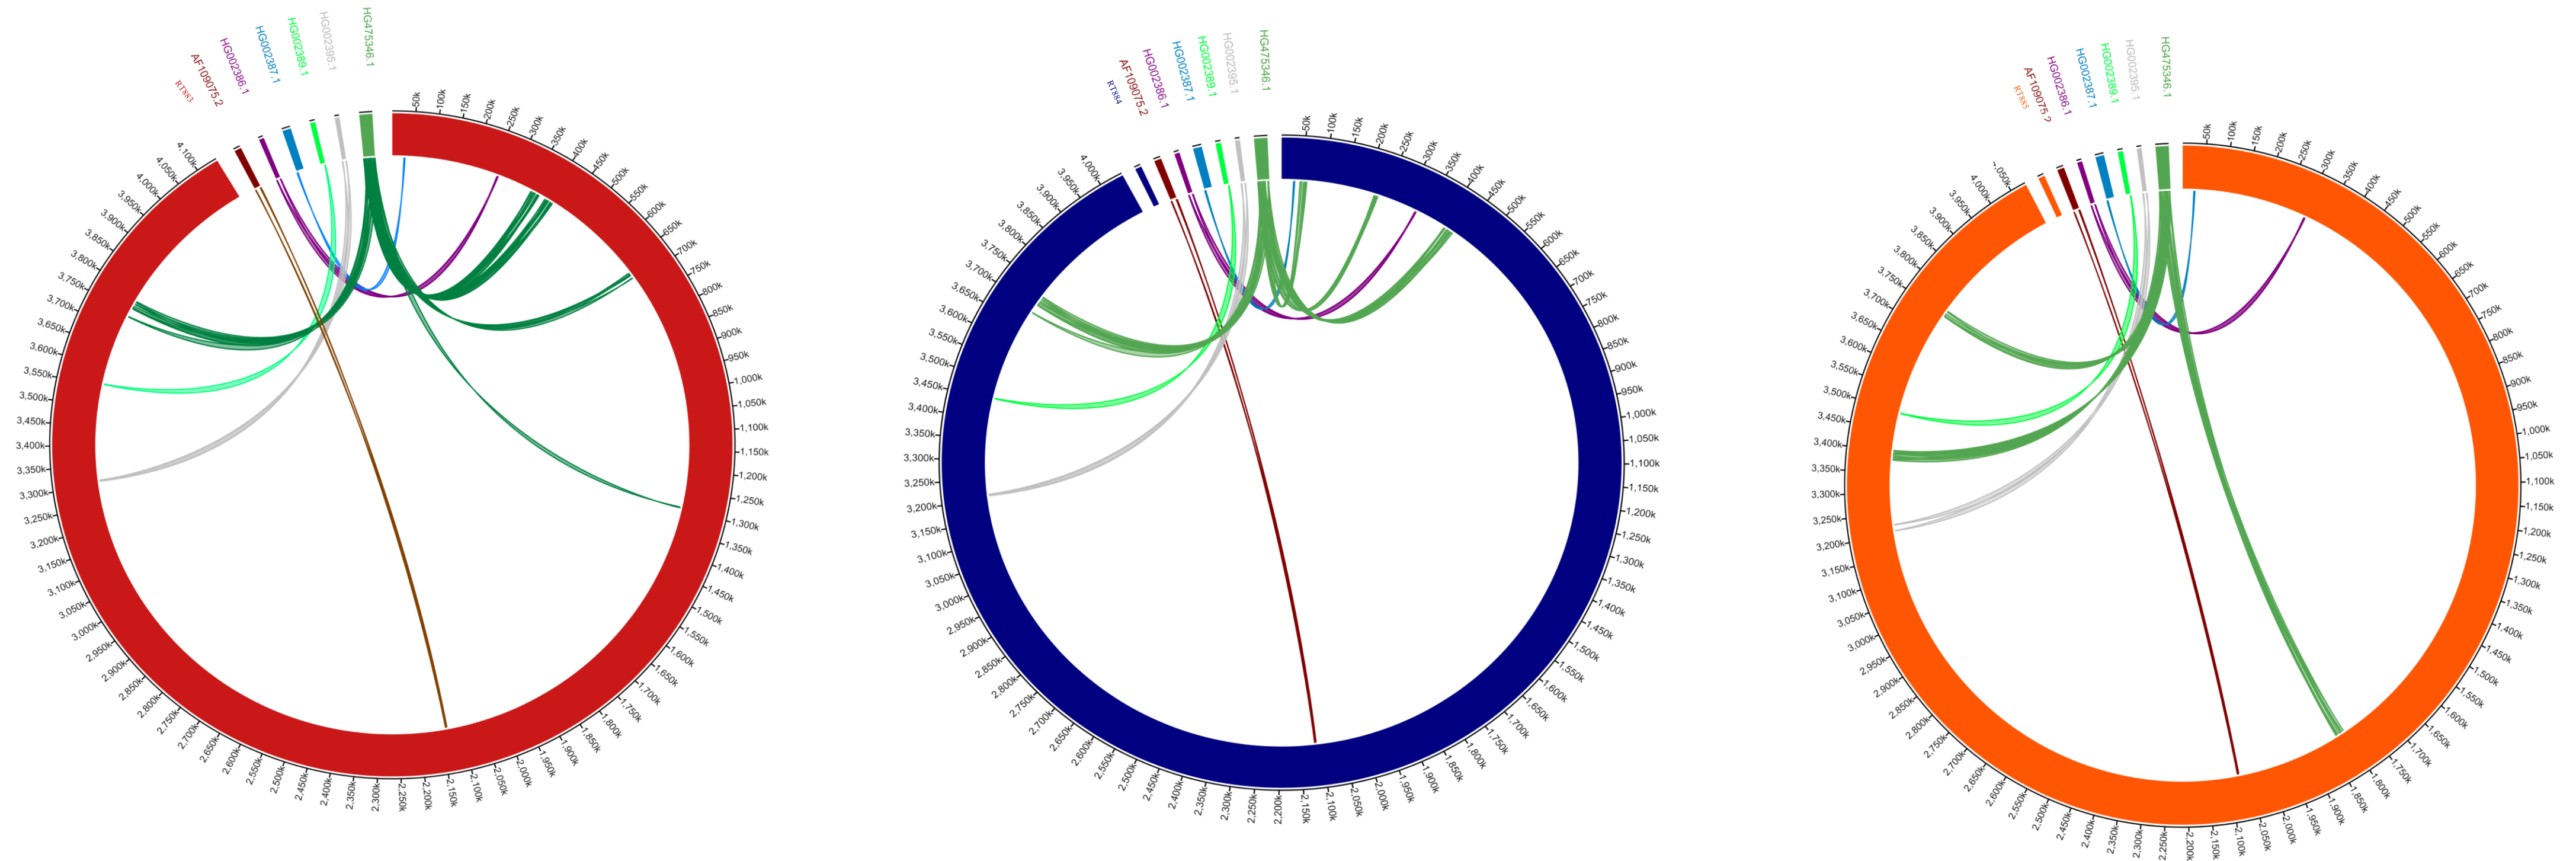

Supplementary Figure 1: Analysis of transposons regions detected on the Brazilian isolates RT883, 884 and 885. RT883 (red); RT884 (blue); RT885 (orange). Part of the following *C. difficile* transposons were detected in the three Brazilian strains: AF109075, HG475346, KC166248, HG002387, HG002396, HG002395, HG002389, HG002386, AF333235, AF226276.



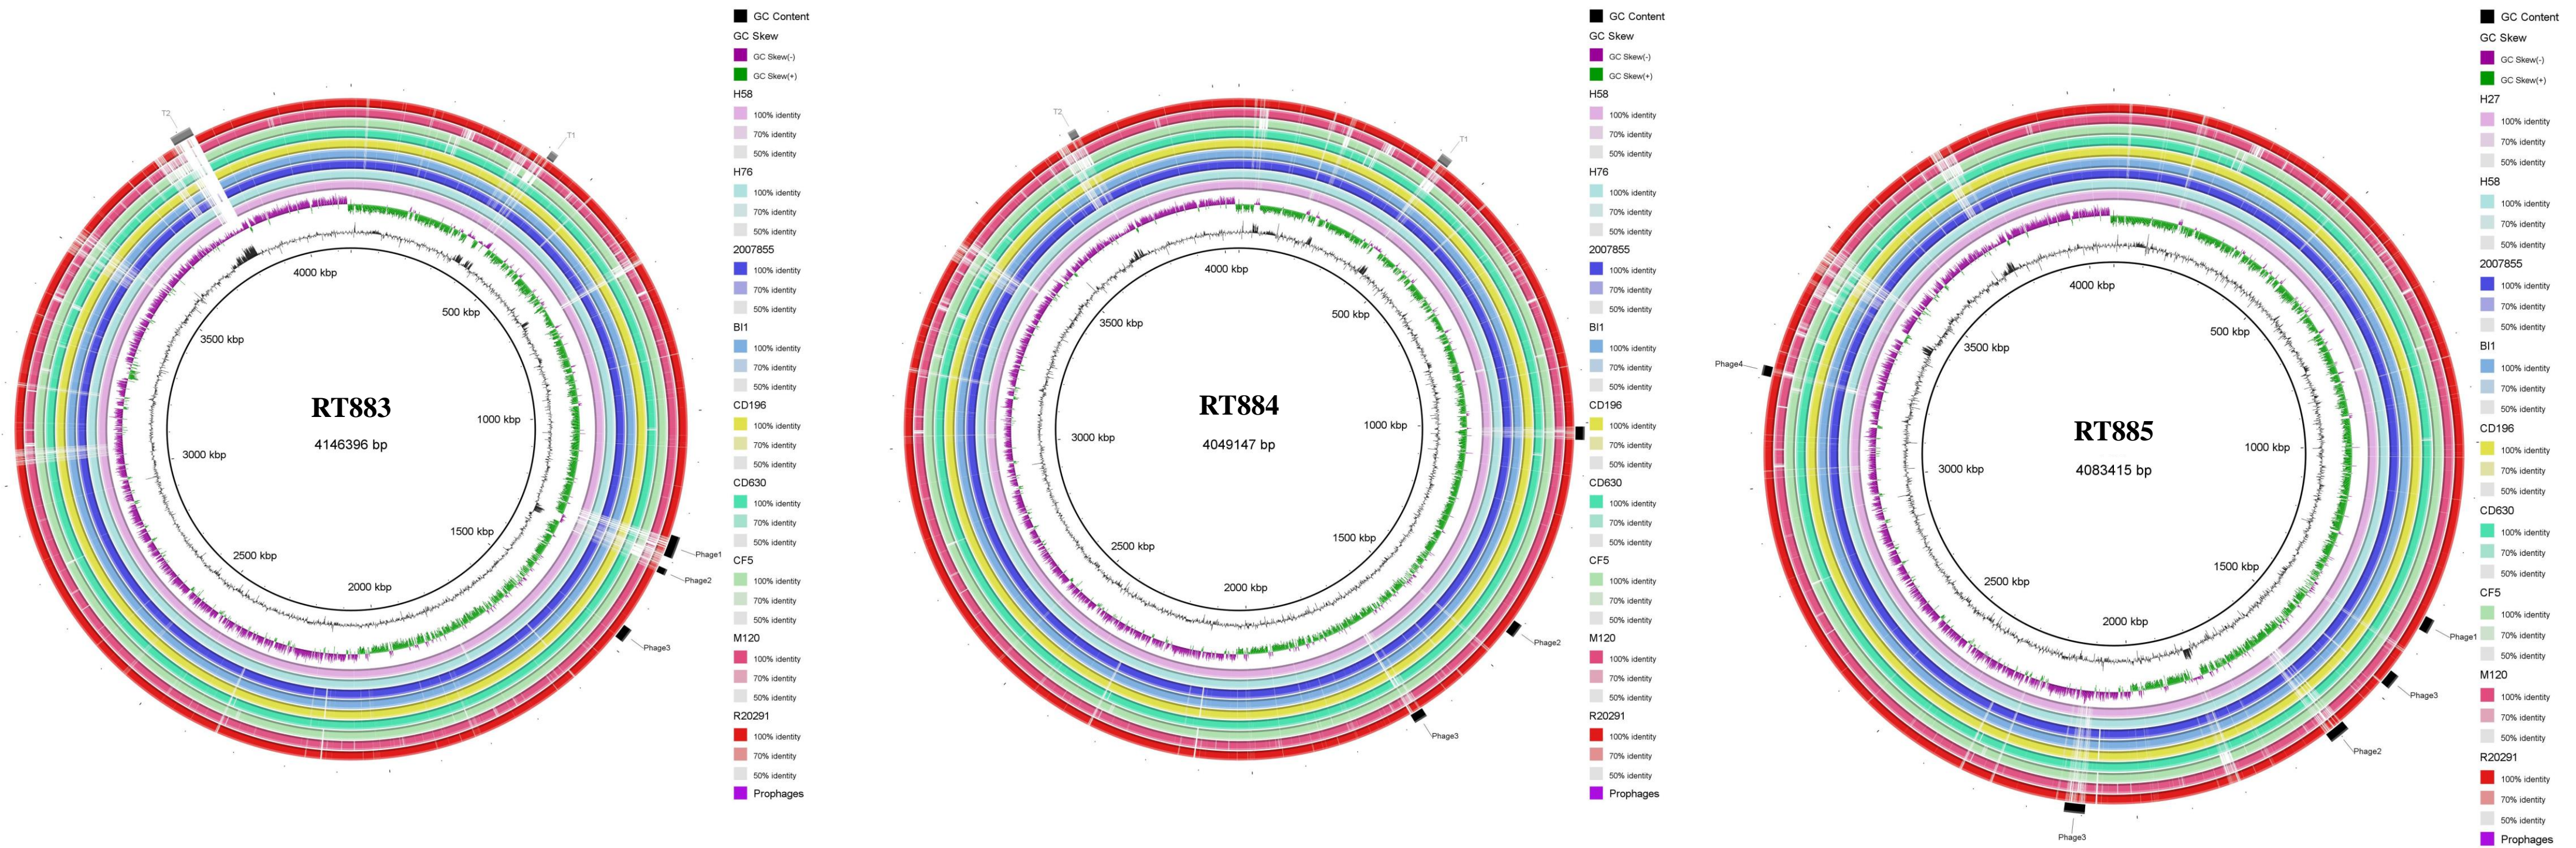

Supplementary Figure 2: Circular representations of *Clostridioides difficile* genomes generated with BRIG software. Graphical circular map of *C. difficile* from RT883, RT884, RT885 genome. From outside to the center: predicted phage regions by PHAST; reference strains R20291, M68, CF5, 2007855, M120, CD196, BI1 and CD630; GC skew; and, GC content.



Supplementary table 2: Alleles from relevant genes (*tcdB*, *tcdC*, *gyrA* and *gyrB*) of three novel Brazilian clade 2 strains (RT883, RT884 and RT885).

| Gene        | Function/Relevance                          | Strains             |                     |                     | Comments                                      |
|-------------|---------------------------------------------|---------------------|---------------------|---------------------|-----------------------------------------------|
|             |                                             | RT883               | RT884               | RT885               |                                               |
| <i>tcdB</i> | Toxin B                                     | +<br>Allele 23*     | +<br>Allele 8       | +<br>Allele10       |                                               |
| <i>tcdC</i> | Negative regulator of toxin gene expression | +<br>Allele 16      | +<br>Allele 57*     | +<br>Allele 8       | Expression affected                           |
| <i>gyrA</i> | Fluorquinolone resistance                   | Allele 76<br>Thr-82 | Allele 76<br>Thr-82 | Allele 76<br>Thr-82 | No typical fluorquinolone resistance mutation |
| <i>gyrB</i> |                                             | Allele 57<br>Thr-82 | Allele 57<br>Thr-82 | Allele 57<br>Thr-82 |                                               |

\*Novel alleles identified in the present study

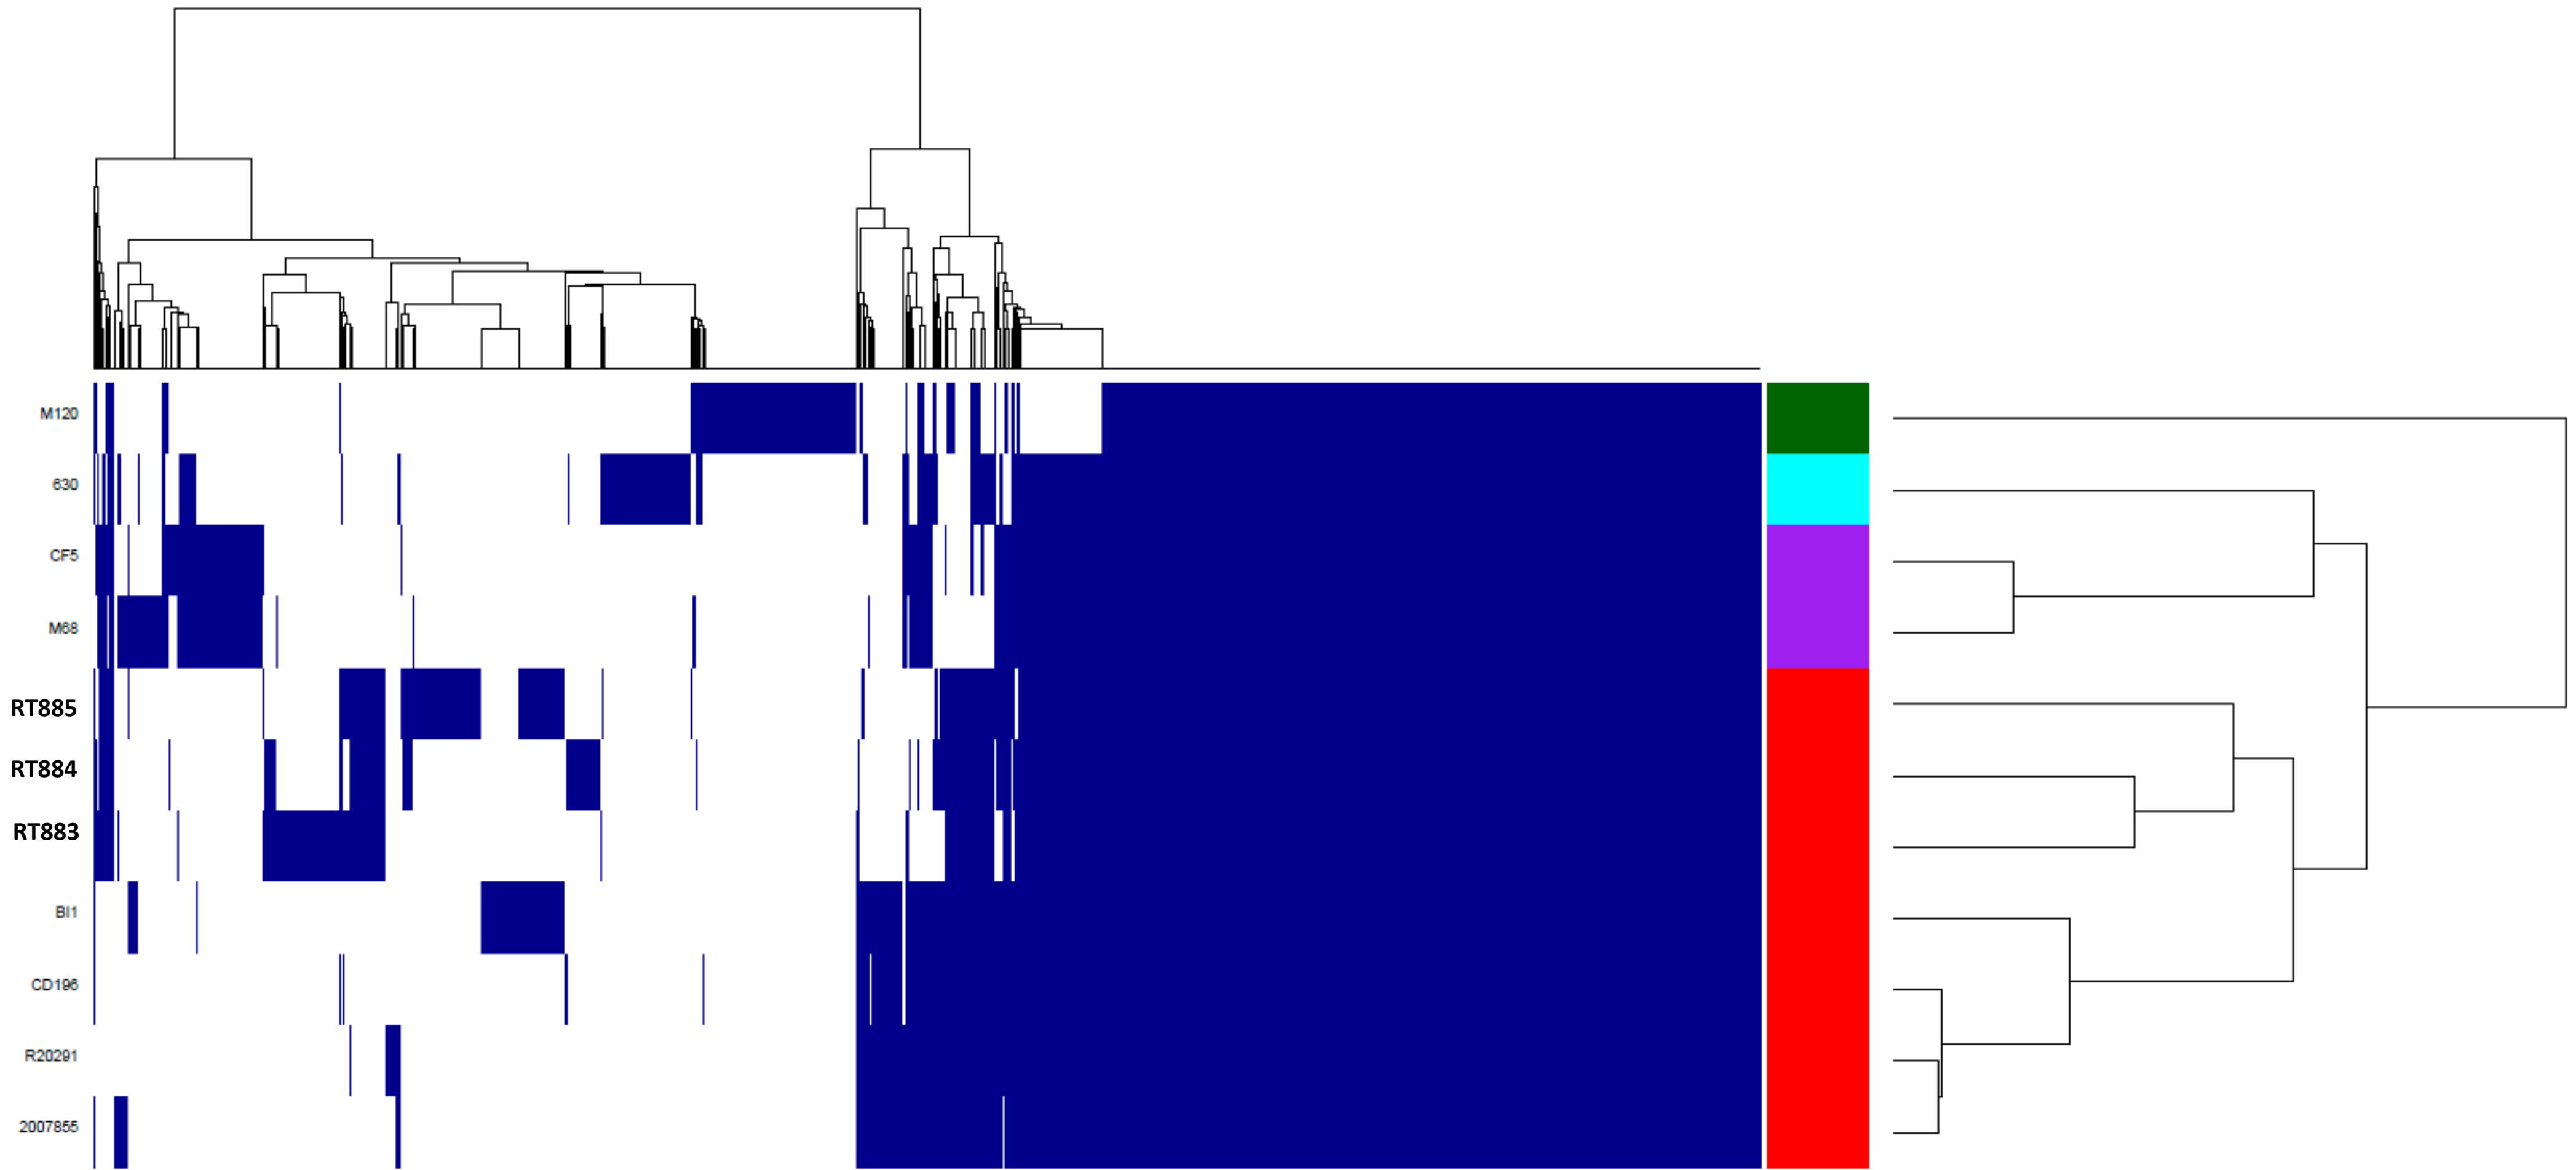

Supplementary Figure 3: Pan-genome and core-genome content of *C. difficile* isolates. (A) In this image, each line corresponds to a *C. difficile* isolate/strain, and each column to a gene. Gene presence/absence is represented respectively by blue and white boxes. The dendrograms in the X and Y axis correspond to the hierarchical clustering of respectively the isolate and gene patterns. The color strip represents the *C. difficile* Clades, where Clade 1, 2, 3 and 5 are represented by respectively cyan, red, purple and green.

Supplementary table 3: Antimicrobial susceptibility of the three novel Brazilian clade 2 strains (RT883, RT884 and RT885) by ETEST (bioMérieux Brazil, France)

| Antimicrobial | RT883   | RT884 | RT885 |
|---------------|---------|-------|-------|
|               | (mg/mL) |       |       |
| Metronidazole | 0,25    | 0,25  | 0,25  |
| Vancomycin    | 0,25    | 0,25  | 1,0   |
| Erythromycin  | 0,75    | 0,75  | 0,75  |
| Clindamycin   | 2,0     | 4,0   | 8,0   |
| Moxifloxacin  | 2,0     | 2,0   | 6,0   |
| Tetracycline  | 0,047   | 0,094 | 0,094 |
| Rifampin      | 0,002   | 0,002 | 0,002 |

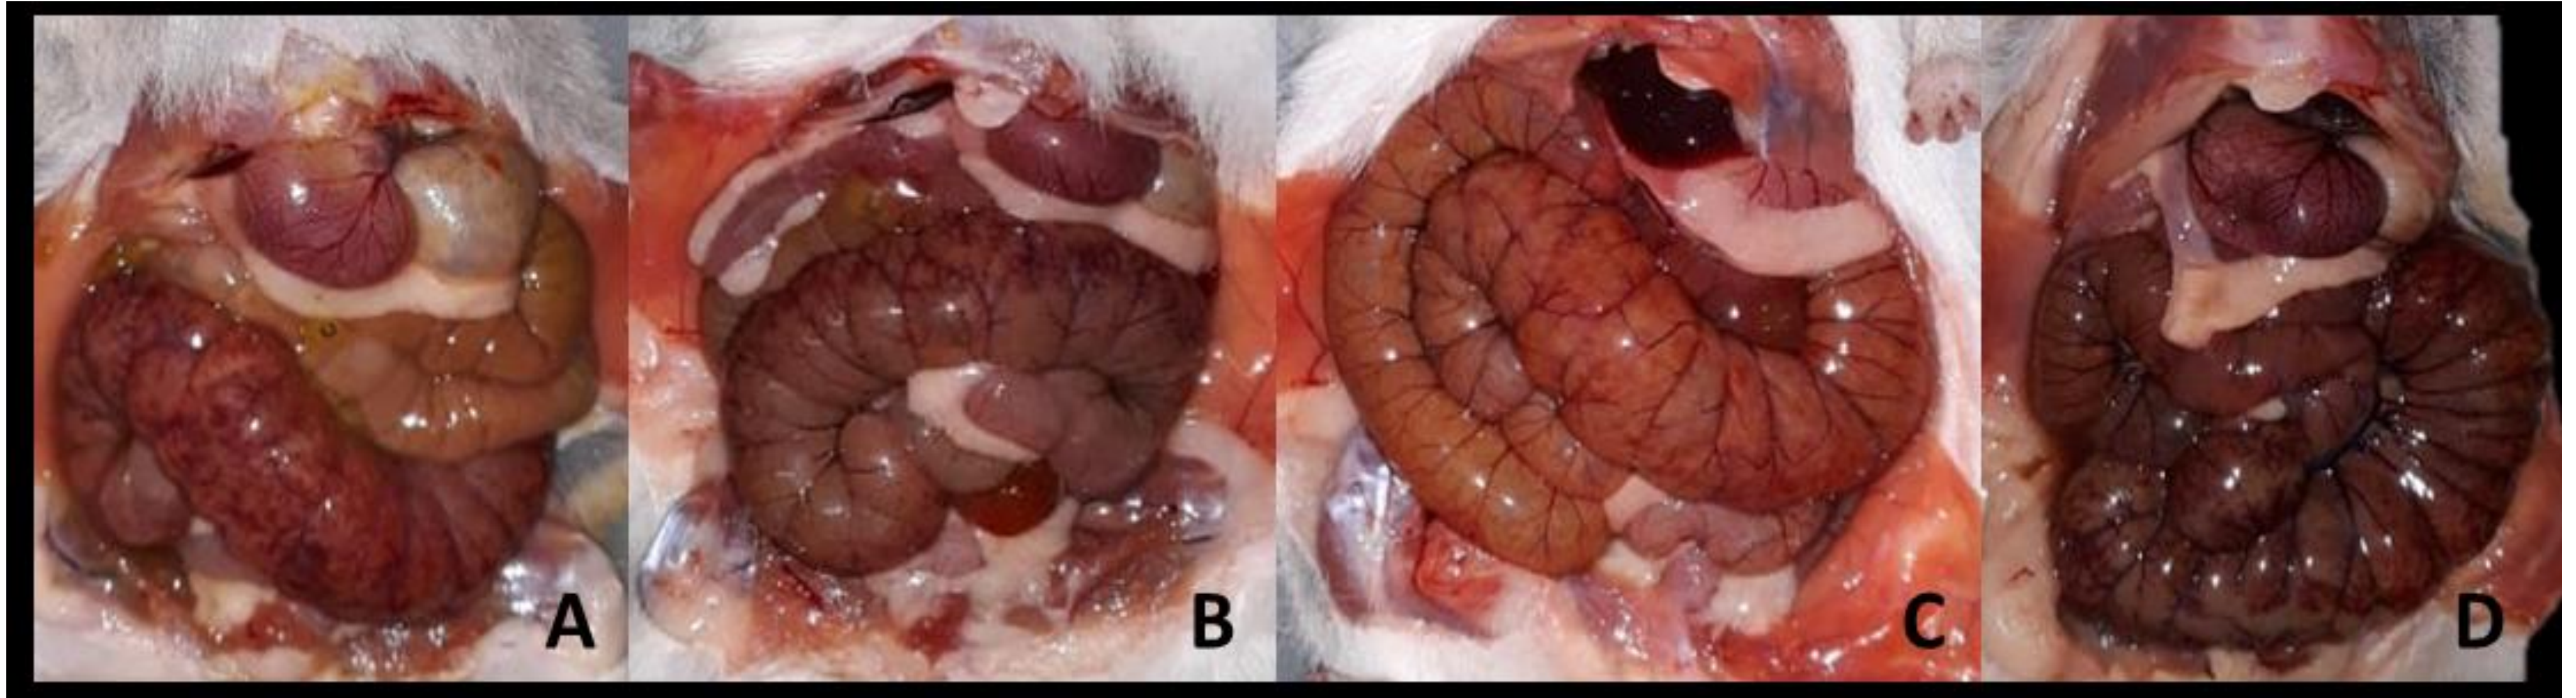

Supplementary Figure 4: Abdominal viscera, adult Syrian hamster (*Mesocricetus auratus*) *C. difficile* infection (CDI) caused by a reference RT027 strain (A), the Brazilian isolates RT883 (B), 884 (C) and 885 (D). In all, the cecum is hyperemic and shows multiple ecchymotic hemorrhages, typical of CDI in this species (Keel and Songer, 2006).
